# Supplementary material for: The evolution of olfactory sensitivity, preferences, and behavioral responses in Mexican cavefish is influenced by fish personality
Source: eLife journal article supplement (doi:10.7554/elife.92861), 2023-12-19
Supplement: supp1 [file elife-92861-supp1-v1.pdf]

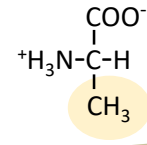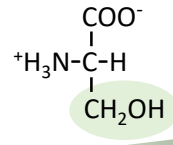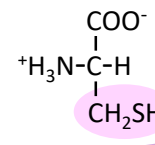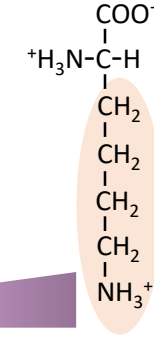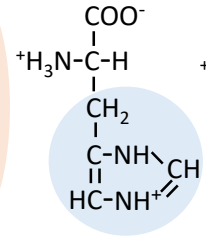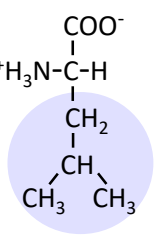

**A**  
population

|                 | alanine<br>10 <sup>-5</sup> M | alanine<br>10 <sup>-4</sup> M | alanine<br>10 <sup>-3</sup> M | alanine<br>10 <sup>-2</sup> M | serine<br>10 <sup>-4</sup> M | serine<br>10 <sup>-3</sup> M | serine<br>10 <sup>-2</sup> M | cysteine<br>10 <sup>-4</sup> M | cysteine<br>10 <sup>-3</sup> M | cysteine<br>10 <sup>-2</sup> M | lysine<br>10 <sup>-2</sup> M | histidine<br>10 <sup>-2</sup> M | leucine<br>10 <sup>-2</sup> M |
|-----------------|-------------------------------|-------------------------------|-------------------------------|-------------------------------|------------------------------|------------------------------|------------------------------|--------------------------------|--------------------------------|--------------------------------|------------------------------|---------------------------------|-------------------------------|
| <b>Speed</b>    |                               |                               |                               |                               |                              |                              |                              |                                |                                |                                |                              |                                 |                               |
| SF              | -                             | ns                            | ns                            | ns                            | -                            | ↗                            | ns                           | ↗                              | ↗                              | ↗                              | ns                           | ns                              | ns                            |
| F2              | -                             | -                             | ↘                             | -                             | -                            | ns                           | ns                           | -                              | -                              | ns                             | ↗                            | ns                              | ns                            |
| CF              | ns                            | ns                            | ↘                             | ns                            | ns                           | ns                           | ns                           | ns                             | ns                             | ns                             | ns                           | ↘                               | ns                            |
| <b>Position</b> |                               |                               |                               |                               |                              |                              |                              |                                |                                |                                |                              |                                 |                               |
| SF              | -                             | ns                            | ns                            | ns                            | -                            | ns                           | ns                           | ns                             | ↘                              | ns                             | ns                           | ns                              | ns                            |
| F2              | -                             | -                             | ↗                             | -                             | -                            | ↗                            | ↗                            | -                              | -                              | ns                             | ns                           | ↗                               | ns                            |
| CF              | ↗                             | ↗                             | ↗                             | ↗                             | ns                           | ↗                            | ↗                            | ↗                              | ↗                              | ↗                              | ns                           | ↗                               | ↗                             |
| <b>NbrtX</b>    |                               |                               |                               |                               |                              |                              |                              |                                |                                |                                |                              |                                 |                               |
| SF              | -                             | ns                            | ns                            | ns                            | -                            | ns                           | ↗                            | ↗                              | ↗                              | ns                             | ns                           | ↗                               | ↗                             |
| F2              | -                             | -                             | ↘                             | -                             | -                            | ns                           | ns                           | -                              | -                              | ns                             | ns                           | ns                              | ns                            |
| CF              | ns                            | ↘                             | ↘                             | ↘                             | ns                           | ↘                            | ↘                            | ns                             | ↘                              | ns                             | ↘                            | ↘                               | ↘                             |
| <b>NbrtY</b>    |                               |                               |                               |                               |                              |                              |                              |                                |                                |                                |                              |                                 |                               |
| SF              | -                             | ↗                             | ns                            | ns                            | -                            | ns                           | ↗                            | ↗                              | ↗                              | ↗                              | ns                           | ↗                               | ns                            |
| F2              | -                             | -                             | ↘                             | -                             | -                            | ns                           | ↗                            | -                              | -                              | ns                             | ↗                            | ns                              | ns                            |
| CF              | ns                            | ↘                             | ↘                             | ↘                             | ns                           | ns                           | ns                           | ns                             | ns                             | ns                             | ↘                            | ↘                               | ns                            |
| <b>Patterns</b> |                               |                               |                               |                               |                              |                              |                              |                                |                                |                                |                              |                                 |                               |
| SF              | -                             | ns                            | ns                            | ns                            | -                            | ns                           | change                       | change                         | ns                             | change                         | ns                           | ns                              | ns                            |
| F2              | -                             | -                             | change                        | -                             | -                            | ns                           | change                       | -                              | -                              | change                         | ns                           | change                          | ns                            |
| CF              | change                        | change                        | change                        | change                        | ns                           | ns                           | change                       | ns                             | change                         | change                         | change                       | change                          | ns                            |

**B**  
individual

| <b>Score &gt; 1.5</b> |     |       |       |       |       |       |       |       |       |       |       |       |       |
|-----------------------|-----|-------|-------|-------|-------|-------|-------|-------|-------|-------|-------|-------|-------|
| SF                    | -   | 3.2%  | 19.3% | 42%   | -     | 25%   | 41.1% | 18.7% | 37.5% | 51%   | 21%   | 42.1% | 21%   |
| F2                    | -   | -     | 50%   | -     | -     | 31.3% | 18.8% | -     | -     | 55%   | 18.7% | 55%   | 36.9% |
| CF                    | 25% | 81.3% | 73.2% | 56.3% | 18.7% | 6.2%  | 35.7% | 31%   | 43.8% | 39.5% | 48.4% | 69.2% | 28%   |
